# Supplementary material for: Fe3O4@carbon@zeolitic imidazolate framework-8 nanoparticles as multifunctional pH-responsive drug delivery vehicles for tumor therapy in vivo
Source: Royal Society of Chemistry journal article supplement (doi:10.1039/c5tb01830g), 2015-01-01
Supplement: c5tb01830g1.pdf [file c5tb01830g1.pdf]

## Supporting information

# **Fe<sub>3</sub>O<sub>4</sub>@carbon@zeolitic imidazolate framework-8 nanoparticles as multifunctional pH-responsive drug delivery vehicles for tumor therapy *in vivo***

Mengni He,<sup>a#</sup> Jiajia Zhou,<sup>b#</sup> Jian Chen,<sup>a</sup> Fangcai Zheng,<sup>a</sup> Dongdong Wang,<sup>a</sup> Ruohong Shi,<sup>a</sup> Zhen Guo,<sup>\*b</sup> Haibao Wang<sup>\*c</sup> and Qianwang Chen<sup>\*a</sup>

*<sup>a</sup>Hefei National Laboratory for Physical Sciences at Microscale, Department of Materials Science & Engineering & Collaborative Innovation Center of Suzhou Nano Science and Technology, CAS High Magnetic Field Laboratory, University of Science and Technology of China, Hefei 230026, China. E-mail: cqw@ustc.edu.cn; Fax: +86 551 63603005; Tel: +86 551 63603005*

*<sup>b</sup>Anhui Key Laboratory for Cellular Dynamics and Chemical Biology, School of Life Sciences, University of Science and Technology of China, Hefei 230027, China. E-mail: zhenguo@ustc.edu.cn*

*<sup>c</sup>Radiology Department of the First Affiliated Hospital of Anhui Medical University, Hefei 230022, China. E-mail: whblqh@mail.ustc.edu.cn.*

# These two authors contributed equally

\* Corresponding author

## Supporting Information Figures

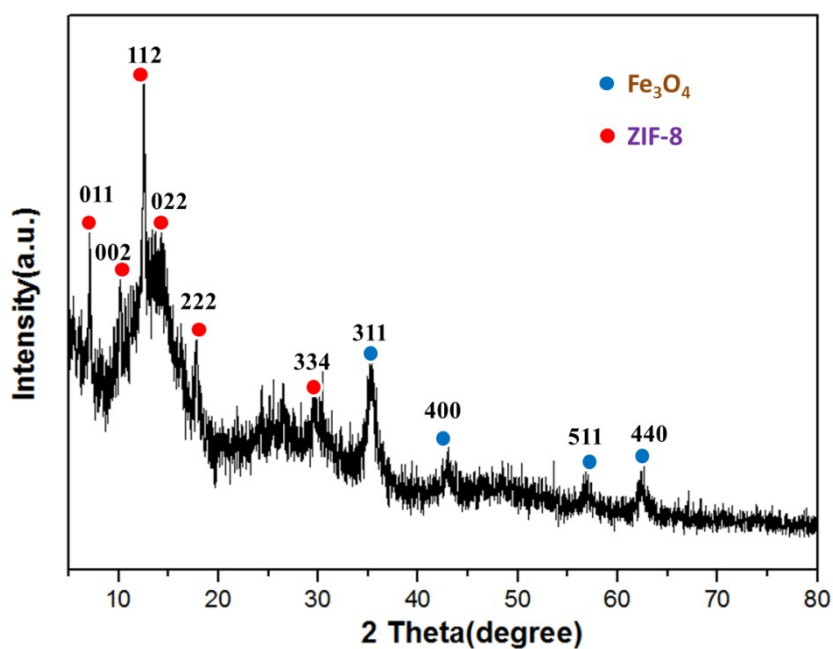

Figure S1. X-ray diffraction pattern of FCZ NPs.

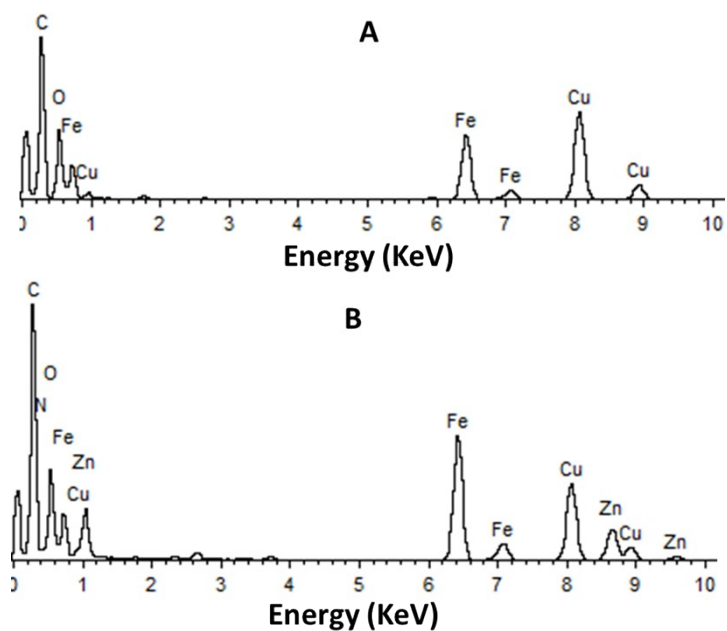

Figure S2. EDX analyses of Fe<sub>3</sub>O<sub>4</sub>@C (A) and FCZ NPs (B).

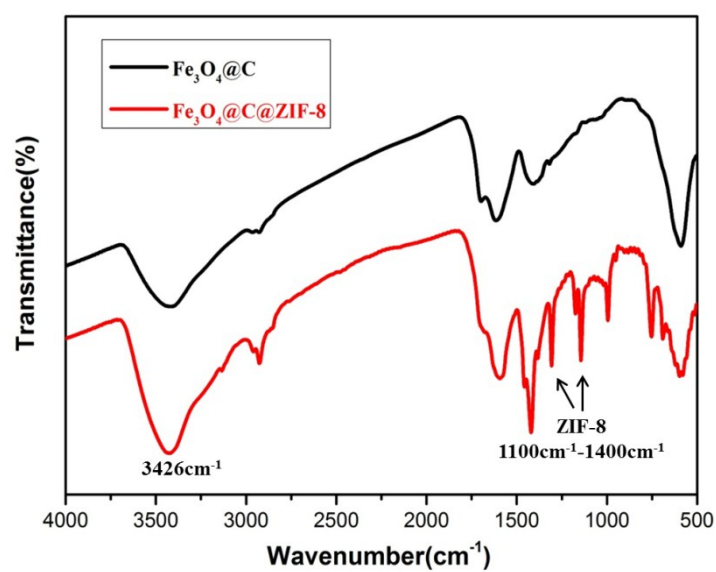

**Figure S3.** FT-IR spectra of Fe<sub>3</sub>O<sub>4</sub>@C and FCZ NPs.

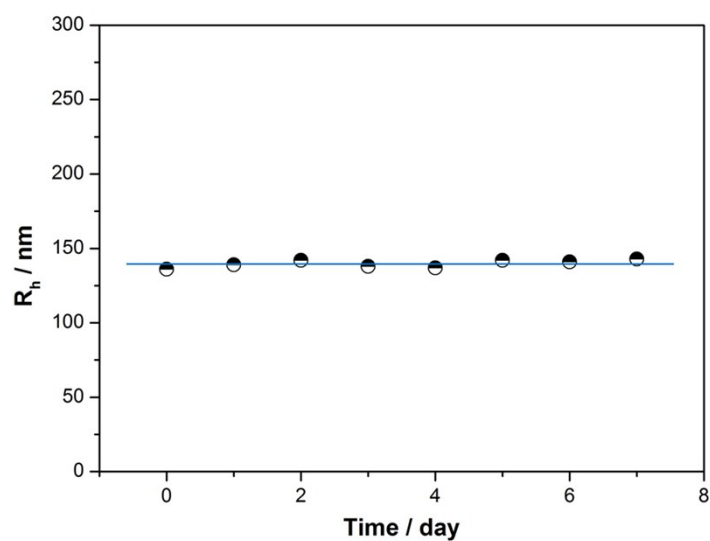

**Figure S4.** *In vitro* stability of FCZ NPs. The size of the nanoparticles in 50% fetal bovine serum was measured by a commercial laser light scattering (LLS) spectrometer (ALV/DLS/SLS-5022 F).

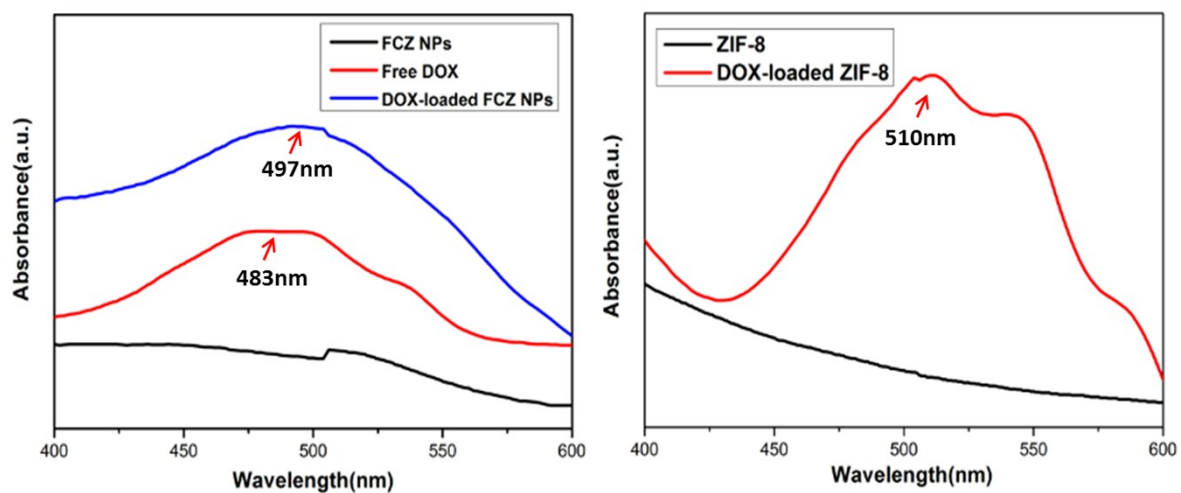

**Figure S5.** UV-Vis absorption spectra of FCZ NPs, free DOX, DOX-loaded FCZ NPs, ZIF-8 and DOX-loaded ZIF-8.
